# Supplementary material for: An Immobilized Form of a Blend of Essential Oils Improves the Density of Beneficial Bacteria, in Addition to Suppressing Pathogens in the Gut and Also Improves the Performance of Chicken Breeding
Source: MDPI journal article supplement (doi:10.3390/microorganisms11081960), 2023-07-31
Supplement: s1 [file s1]

**Table S1.** Ingredient and nutrient composition on basal Diet (as fed basis, %)

| Ingredients Composition (g/kg)              | Pre-Starter<br>(d 1 - 14) | Starter<br>(d 15 - 28) | Finisher<br>(29 d onwards) |
|---------------------------------------------|---------------------------|------------------------|----------------------------|
| Maize                                       | 539.8                     | 556.1                  | 582.0                      |
| Soy bean meal                               | 348.0                     | 316.7                  | 270.8                      |
| Meat and bone meal                          | 39.7                      | 39.7                   | 39.7                       |
| Stone grit                                  | 24.5                      | 10.6                   | 10.7                       |
| Fat (Vegetable oil)                         | 19.0                      | 42.9                   | 63.4                       |
| Dicalcium phosphate (DCP)                   | 15.2                      | 18.6                   | 16.0                       |
| DL-methionine                               | 3.05                      | 2.65                   | 2.67                       |
| L- Lysine HCl                               | 1.35                      | 0.750                  | 1.12                       |
| L-Threonine                                 | 0.653                     | 0.260                  | 0.39                       |
| Common salt                                 | 4.0                       | 4.1                    | 4.0                        |
| Trace Mineral Mix <sup>1</sup>              | 1.225                     | 2.0                    | 2.5                        |
| AB2D3K <sup>2</sup>                         | 0.204                     | 0.360                  | 0.375                      |
| B complex vitamin <sup>3</sup>              | 0.204                     | 0.360                  | 0.375                      |
| Choline chloride                            | 1.02                      | 2.0                    | 2.5                        |
| Toxin binder (Bentonite)                    | 1.02                      | 2.0                    | 2.5                        |
| Sodium bicarbonate                          | 1.02                      | 1.0                    | 1.0                        |
| Nutrient Composition (%)                    |                           |                        |                            |
| Metabolizable energy (Kcal/kg) <sup>4</sup> | 3000                      | 3100                   | 3250                       |
| Protein <sup>5</sup>                        | 23.7                      | 22.3                   | 23.7                       |
| d Lysine <sup>4</sup>                       | 1.28                      | 1.15                   | 1.06                       |
| d Methionine <sup>4</sup>                   | 0.64                      | 0.57                   | 0.56                       |
| d TSAA <sup>4</sup>                         | 0.95                      | 0.87                   | 0.83                       |
| d Threonine <sup>4</sup>                    | 0.86                      | 0.77                   | 0.71                       |
| d Tryptophan <sup>4</sup>                   | 0.27                      | 0.25                   | 0.23                       |
| Calcium <sup>5</sup>                        | 0.96                      | 0.87                   | 0.88                       |
| Total Phosphorus <sup>5</sup>               | 0.75                      | 0.70                   | 0.68                       |
| Available Phosphorus <sup>4</sup>           | 0.48                      | 0.44                   | 0.44                       |

1 composition (g/kg): manganese:110; zinc:100; copper:20; iron:110; selenium:1.5; iodine: 2.5; cobalt:1.0; chromium: 0.4;

2 composition (per g): retinolacetate: 82500IU; riboflavin: 50mg; cholecalciferol: 12000IU; menadione: 12000IU;

3 composition (mg/per g): thiamin:4; pyridoxin:8; cyanocobalamine:0.04;  $\alpha$ -tocopherol:40; Calcium D Pantothenate:40; Niacin: 60; biotin:1.2;folic acid:4

4 Calculated

5 Analysed
