# Supplementary material for: An Immobilized Form of a Blend of Essential Oils Improves the Density of Beneficial Bacteria, in Addition to Suppressing Pathogens in the Gut and Also Improves the Performance of Chicken Breeding
Source: MDPI journal article supplement (doi:10.3390/microorganisms11081960), 2023-07-31
Supplement: s1 [file s1]

**Table S4.** Effects of treatments on abundance of *E.coli* and *Lactobacillus spp.* in gut content

| Group/parameter | E coli (log 10 values) | Lactobacillus (log 10 values) | Total bacteria(log10 values) |
|-----------------|------------------------|-------------------------------|------------------------------|
| V               | 2.78b                  | 2.50c                         | 9.22                         |
| C               | 2.48b                  | 2.59c                         | 9.49                         |
| Y               | 2.50b                  | 2.65c                         | 9.16                         |
| EO1             | 0.943a                 | 0.906a                        | 9.33                         |
| EO2             | 0.949a                 | 1.62b                         | 9.45                         |
| SEM             | 0.180                  | 0.193                         | 0.093                        |
| P Value         | <0.0001                | <0.0001                       | 0.221                        |
| N               | 6                      | 6                             | 6                            |

C, control (basal diet); V; virginiamycin (40g/ton); Y, Yeast (*S. cerevisiae*, 25 billion CFU/g;500g/ton); EO1, Essential oil mix immobilized microspheres (200g/ton), EO2, Essential oil mix immobilized microspheres (400g/ton); P, probability; SEM, standard error mean; means bearing common superscript does not differ significantly (P<0.05)
