# Supplementary material for: An Immobilized Form of a Blend of Essential Oils Improves the Density of Beneficial Bacteria, in Addition to Suppressing Pathogens in the Gut and Also Improves the Performance of Chicken Breeding
Source: MDPI journal article supplement (doi:10.3390/microorganisms11081960), 2023-07-31
Supplement: s1 [file s1]

**Table S3.** Effect of additives on serum antioxidant enzymes, HI titre against Newcastle disease virus and cutaneous response to phytohaemagglutinin P

| Treatment | CMI<br>Response(mm<br>increase in skin<br>thickness) | HI titer,<br>log 2 | LPX, (nmol<br>MDA/mg) | GPX<br>(units/ml) | GRX<br>(units/ml) | SOD<br>(units/ml) |
|-----------|------------------------------------------------------|--------------------|-----------------------|-------------------|-------------------|-------------------|
| V         | 0.415a                                               | 4.167              | 7.763                 | 311.9b            | 1929              | 2.931             |
| C         | 0.643a                                               | 2.667              | 8.042                 | 327.1b            | 2011              | 3.410             |
| Y         | 0.398a                                               | 3.667              | 8.752                 | 281.1b            | 2012              | 4.141             |
| EO1       | 1.018b                                               | 4.167              | 8.445                 | 207.3a            | 2062              | 3.390             |
| EO2       | 1.028b                                               | 4.333              | 8.103                 | 210.5a            | 2011              | 4.601             |
| SEM       | 0.055                                                | 0.212              | 0.149                 | 8.96              | 26.76             | 0.220             |
| P value   | 0.001                                                | 0.297              | 0.418                 | 0.001             | 0.886             | 0.329             |

<sup>abc</sup> means having common superscript in a column do not vary significantly ( $P < 0.005$ ) CMI cell mediated immunity; ND Newcastle disease; LPX Lipid Peroxidation; GPX Glutathione Peroxidase; GRX Glutathione Reductase; SOD Superoxide dismutase; C, control (basal diet); V, virginiamycin (40g/ton); Y, Yeast (*S. cerevisiae*, 25 billion CFU/g; 500g/ton); EO1, Essential oil mix immobilized microspheres (200g/ton), EO2, Essential oil mix immobilized microspheres (400g/ton); P, probability; SEM, standard error mean
