# Supplementary material for: An Immobilized Form of a Blend of Essential Oils Improves the Density of Beneficial Bacteria, in Addition to Suppressing Pathogens in the Gut and Also Improves the Performance of Chicken Breeding
Source: MDPI journal article supplement (doi:10.3390/microorganisms11081960), 2023-07-31
Supplement: s1 [file s1]

**Table S6:** Statistical analysis of beta diversity measures for comparing microbial community composition among different groups (PERMANOVA and PERMDISP results along with PCoA/NMDS parameters).

|                 |                  |           |                |         | PCoA                         |                              | NMDS   |                  |
|-----------------|------------------|-----------|----------------|---------|------------------------------|------------------------------|--------|------------------|
| Taxonomic level | Diversity metric | PERMANOVA |                |         | % variation explained at PC1 | % variation explained at PC2 | Stress | PERMDISP-P-value |
|                 |                  | Pseudo-F  | R <sup>2</sup> | P-value |                              |                              |        |                  |
| OTU             | Bray-Curtis      | 3.44      | 0.355          | <0.001  | 24.4                         | 19.9                         | 0.1048 | 0.519            |
|                 | Jaccard          | 2.45      | 0.282          | <0.001  | 16.7                         | 15.1                         | 0.1048 | 0.492            |
|                 | Jensen-Shannon   | 5.61      | 0.473          | <0.001  | 36.1                         | 26.1                         | 0.1013 | 0.580            |
| Phylum          | Bray-Curtis      | 2.85      | 0.313          | 0.009   | 55.1                         | 42.2                         | 0.1165 | 0.877            |
|                 | Jaccard          | 2.89      | 0.316          | 0.006   | 50.0                         | 39.0                         | 0.1165 | 0.618            |
|                 | Jensen-Shannon   | 5.28      | 0.458          | <0.001  | 78.9                         | 41.1                         | 0.0450 | 0.218            |
