# Supplementary material for: An Immobilized Form of a Blend of Essential Oils Improves the Density of Beneficial Bacteria, in Addition to Suppressing Pathogens in the Gut and Also Improves the Performance of Chicken Breeding
Source: MDPI journal article supplement (doi:10.3390/microorganisms11081960), 2023-07-31
Supplement: s1 [file s1]

**Table S5:** Statistical analysis of alpha diversity measures

| Metricres         | Mean values |       |       |       |       | Kruskal-Wallis test (P-value) | Dunn post hoc test –FDR adjusted P values |       |        |        |      |        |        |        |        |          |
|-------------------|-------------|-------|-------|-------|-------|-------------------------------|-------------------------------------------|-------|--------|--------|------|--------|--------|--------|--------|----------|
|                   | C           | V     | Y     | EO1   | EO2   |                               | C_V                                       | C_Y   | C_E O1 | C_E O2 | V_Y  | V_E O1 | V_E O2 | Y_EO 1 | Y_EO 2 | EO1_E O2 |
| Richness          |             |       |       |       |       |                               |                                           |       |        |        |      |        |        |        |        |          |
| Observed richness | 625.8       | 769.5 | 901   | 916   | 1034  | 0.026                         | 1.00                                      | 0.616 | 0.217  | 0.028  | 1.00 | 1.00   | 0.358  | 1.00   | 1.00   | 1.00     |
| Chao1             | 936         | 1430  | 1809  | 1825  | 2126  | 0.007                         | 1.00                                      | 0.059 | 0.059  | 0.012  | 1.00 | 1.00   | 0.663  | 1.00   | 1.00   | 1.00     |
| ACE               | 1009        | 1618  | 2055  | 2102  | 2469  | 0.003                         | 1.00                                      | 0.043 | 0.048  | 0.004  | 1.00 | 1.00   | 0.304  | 1.00   | 1.00   | 1.00     |
| Diversity         |             |       |       |       |       |                               |                                           |       |        |        |      |        |        |        |        |          |
| Simpson           | 0.896       | 0.888 | 0.930 | 0.876 | 0.963 | 0.139                         |                                           |       |        |        |      |        |        |        |        |          |
| Shannon           | 3.98        | 3.81  | 4.12  | 4.01  | 4.63  | 0.113                         |                                           |       |        |        |      |        |        |        |        |          |
| Fisher            | 159         | 204   | 253   | 264   | 306   | 0.026                         | 1.00                                      | 0.616 | 0.217  | 0.028  | 1.00 | 1.00   | 0.358  | 1.00   | 1.00   | 1.00     |

C, control (basal diet); V; virginiamycin (40g/ton); Y, Yeast (*S. cerevisiae*, 25 billion CFU/g;500g/ton); EO1, Essential oil mix immobilized microspheres (200g/ton), EO2, Essential oil mix immobilized microspheres (400g/ton)
