# Supplementary material for: An Immobilized Form of a Blend of Essential Oils Improves the Density of Beneficial Bacteria, in Addition to Suppressing Pathogens in the Gut and Also Improves the Performance of Chicken Breeding
Source: MDPI journal article supplement (doi:10.3390/microorganisms11081960), 2023-07-31
Supplement: s1 [file s1]

**Table S2.** Effect of supplementing feed additives on apparent total tract digestibility (nutrient retention)

|         | Total tract nutrient retention (g /kg) |       |       |
|---------|----------------------------------------|-------|-------|
|         | DM                                     | EE    | CP    |
| V       | 78.09                                  | 91.8  | 88.2  |
| C       | 76.09                                  | 91.6  | 88.8  |
| Y       | 77.6                                   | 92.2  | 88.2  |
| EO1     | 77.0                                   | 92.3  | 88.0  |
| EO2     | 77.1                                   | 92.2  | 88.7  |
| SEM     | 0.535                                  | 0.187 | 0.277 |
| N       | 4                                      | 4     | 4     |
| P value | 0.154                                  | 0.089 | 0.254 |

C, control (basal diet); V; virginiamycin (40g/ton); Y, Yeast (*S. cerevisiae*, 25 billion CFU/g;500g/ton); EO1, Essential oil mix immobilized microspheres (200g/ton), EO2, Essential oil mix immobilized microspheres (400g/ton); P, probability; N, number of replicates; SEM, standard error mean
